# Supplementary material for: Neonatal Abstinence Syndrome and Childhood Mental Health Conditions, 2009–2015: Commercial Versus Medicaid Populations
Source: Atypon-hosted journal article supplement (doi:10.1176/appi.ps.201900180), 2019-10-16
Supplement: appi.ps.201900180.ds001.pdf [file appi.ps.201900180.ds001.pdf]

|                                                                    | HEDIS 5-Year Continuous Enrollment |                                        | HEDIS 3-Year Continuous Enrollment |                                        | HEDIS 1-Year Continuous Enrollment  |                                        |
|--------------------------------------------------------------------|------------------------------------|----------------------------------------|------------------------------------|----------------------------------------|-------------------------------------|----------------------------------------|
|                                                                    | NAS Population<br>n = 190 (0.01%)  | Non-NAS<br>Population<br>n = 1,405,522 | NAS Population<br>n = 626 (0.02%)  | Non-NAS<br>Population<br>n = 3,123,585 | NAS Population<br>n = 1,683 (0.02%) | Non-NAS<br>Population<br>n = 6,748,991 |
| Diagnosis                                                          | Frequency (%)                      | Frequency (%)                          | Frequency (%)                      | Frequency (%)                          | Frequency (%)                       | Frequency (%)                          |
| Any mental disorder                                                | 68 (35.79%)                        | 313,021 (22.27%)                       | 190 (30.35%)                       | 568,224 (18.19%)                       | 339 (20.14%)                        | 837,872 (12.41%)                       |
| Specific delays in development (315)                               | 48 (25.26%)                        | 115,785 (8.24%)                        | 146 (23.32%)                       | 240,346 (7.69%)                        | 274 (16.28%)                        | 386,282 (5.72%)                        |
| Disturbance of conduct (312)                                       | 11 (5.79%)                         | 37,170 (2.64%)                         | 20 (3.19%)                         | 64,479 (2.06%)                         | 25 (1.49%)                          | 89,985 (1.33%)                         |
| Hyperkinetic syndrome of childhood (314)                           | 13 (6.84%)                         | 102,770 (7.31%)                        | 21 (3.35%)                         | 157,771 (5.05%)                        | 28 (1.66%)                          | 199,372 (2.95%)                        |
| Adjustment reaction (309)                                          | 9 (4.74%)                          | 63,295 (4.50%)                         | 17 (2.72%)                         | 98,587 (3.16%)                         | 18 (1.07%)                          | 127,320 (1.89%)                        |
| Acute reaction to stress (308)                                     | 2 (1.05%)                          | 6,995 (0.50%)                          | 3 (0.48%)                          | 12,702 (0.40%)                         | 6 (0.36%)                           | 17,714 (0.26%)                         |
| Neurotic disorders (300)                                           | 9 (4.74%)                          | 60,749 (4.32%)                         | 10 (1.60%)                         | 89,105 (2.85%)                         | 14 (0.83%)                          | 108,424 (1.61%)                        |
| Special symptoms or syndromes (307)                                | 11 (5.79%)                         | 58,585 (4.17%)                         | 25 (3.99%)                         | 103,483 (3.31%)                        | 46 (2.73%)                          | 145,890 (2.16%)                        |
| Disturbance of emotion specific to childhood and adolescence (313) | 2 (1.05%)                          | 23,686 (1.69%)                         | 2 (0.32%)                          | 37,676 (1.21%)                         | 6 (0.36%)                           | 49,047 (0.73%)                         |
| Intellectual disabilities (317-319)                                | 1 (0.53%)                          | 2,596 (0.18%)                          | 3 (0.48%)                          | 4,250 (0.14%)                          | 4 (0.24%)                           | 5,813 (0.09%)                          |
| Psychoses with origin specific to childhood (299)                  | 8 (4.21%)                          | 26,860 (1.91%)                         | 15 (2.40%)                         | 48,898 (1.57%)                         | 18 (1.07%)                          | 71,332 (1.06%)                         |
